# Supplementary material for: Digitalizing a Brief Intervention to Reduce Intrusive Memories of Psychological Trauma: Qualitative Interview Study
Source: PubMed Central journal article supplement (PMC7939943; doi:10.2196/23712), 2021-02-22
Supplement: mental_v8i2e23712_app1.pdf [file mental_v8i2e23712_app1.pdf]

**Supplementary Materials: Multimedia Appendix 1**  
 Guiding Principles for Development of the Digitalised Intervention Materials

Guiding Principles for the “What Are Intrusive Memories?” Materials

| <b>Video and Quiz Design Objectives – “What Are Intrusive Memories?”</b>                                                                  | <b>Key Features</b>                                                                                                                                                                                                                                                                                                                                                                                                                                                                                                                                                                                                  |
|-------------------------------------------------------------------------------------------------------------------------------------------|----------------------------------------------------------------------------------------------------------------------------------------------------------------------------------------------------------------------------------------------------------------------------------------------------------------------------------------------------------------------------------------------------------------------------------------------------------------------------------------------------------------------------------------------------------------------------------------------------------------------|
| Know how to accurately identify what an intrusive memory is and what it is not in a way that can be understood by the general public      | <ul style="list-style-type: none"> <li>• Identify the definition of an intrusive memory.</li> <li>• Understand what an intrusive memory is not (e.g. rumination, “thinking in words” about the event).</li> </ul>                                                                                                                                                                                                                                                                                                                                                                                                    |
| Understand the phenomenology of intrusive memories                                                                                        | <ul style="list-style-type: none"> <li>• Understand they can be vivid, short, broken-up, and fleeting.</li> <li>• Understand that they most commonly take the form of visual memories, but may include other sensory sensations as well (e.g. sounds, smells).</li> <li>• Understand how they may be triggered (e.g. by seeing something similar on the news, or in real life that reminds one of the event).</li> <li>• Understand the functional impact of intrusive memories (e.g. that they can impact social functioning such as making it harder to keep in touch with friends, and concentration).</li> </ul> |
| To provide a low-cost, scalable explanation and visual demonstration of what intrusive memories are in a thoughtful and generalisable way | <ul style="list-style-type: none"> <li>• Limit the need for researcher/clinical explanation of what intrusive memories are.</li> <li>• Visually showing intrusive memories can be related to distress, by adding a character with a concerned facial expression.</li> <li>• Creating a character that is gender ambiguous.</li> <li>• Choosing broad yet not disturbing visual examples of trauma memories (e.g. a picture of a car to represent a car accident, or three droplets of blood to represent a violent memory).</li> </ul>                                                                               |

Guiding Principles for the “How to Play Tetris” Materials

| <b>Video and Quiz Design Objectives – “How to Play Tetris”</b>                                                                 | <b>Key Features</b>                                                                                                                                                                                                                                                                                                       |
|--------------------------------------------------------------------------------------------------------------------------------|---------------------------------------------------------------------------------------------------------------------------------------------------------------------------------------------------------------------------------------------------------------------------------------------------------------------------|
| Be able to understand the basic concept of the game                                                                            | <ul style="list-style-type: none"> <li>• Place blocks in a way that will clear the rows.</li> <li>• How to drag and move the blocks.</li> <li>• How to rotate the blocks.</li> </ul>                                                                                                                                      |
| Know how to use mental rotation                                                                                                | <ul style="list-style-type: none"> <li>• Plan where to place the blocks by really twisting and turning them in the mind’s eye to decide where they should go next.</li> <li>• Refer to the 3 upcoming blocks displayed on the right side of the game.</li> </ul>                                                          |
| Understand that importance of playing Tetris with these special instructions                                                   | <ul style="list-style-type: none"> <li>• Process over points – using mental rotation and planning is more important than scoring points.</li> <li>• It is important to play the game carefully, to allow time for planning.</li> </ul>                                                                                    |
| To provide a low-cost, scalable explanation and demonstration of how to play the game in adherence to previous study protocols | <ul style="list-style-type: none"> <li>• Limit the need for researcher/clinician explanation of how to play the game and what is meant by mental rotation.</li> <li>• A brief yet informative overview of the special game instructions that includes examples.</li> <li>• Reminders of the main goal of game.</li> </ul> |
