# Supplementary material for: Digitalizing a Brief Intervention to Reduce Intrusive Memories of Psychological Trauma: Qualitative Interview Study
Source: PubMed Central journal article supplement (PMC7939943; doi:10.2196/23712), 2021-02-22
Supplement: mental_v8i2e23712_app3.pdf [file mental_v8i2e23712_app3.pdf]

**Supplementary Materials: Multimedia Appendix 5**  
Codes derived from qualitative content analysis of participant feedback

**Feedback on the “What are intrusive memories?” video and quiz**

| Positive                                                                                                                                                                                                                                                                                                                                                                                                                                                                                                                                                                                                                                                                                                                                                                                                                                                                                                                                                                                                                                                                                                                                                                                                                                                                                                                                                                                                                                                                     | Suggested changes                                                                                                                                                                                                                                                                                                                                                                                                                                                                                                                                                                                                                                                                                                                                                                                                                                                                                                                                                                                                                                                                                                                                                                                                                                                                                                                                                                                                                                                                                                                                                                                    |
|------------------------------------------------------------------------------------------------------------------------------------------------------------------------------------------------------------------------------------------------------------------------------------------------------------------------------------------------------------------------------------------------------------------------------------------------------------------------------------------------------------------------------------------------------------------------------------------------------------------------------------------------------------------------------------------------------------------------------------------------------------------------------------------------------------------------------------------------------------------------------------------------------------------------------------------------------------------------------------------------------------------------------------------------------------------------------------------------------------------------------------------------------------------------------------------------------------------------------------------------------------------------------------------------------------------------------------------------------------------------------------------------------------------------------------------------------------------------------|------------------------------------------------------------------------------------------------------------------------------------------------------------------------------------------------------------------------------------------------------------------------------------------------------------------------------------------------------------------------------------------------------------------------------------------------------------------------------------------------------------------------------------------------------------------------------------------------------------------------------------------------------------------------------------------------------------------------------------------------------------------------------------------------------------------------------------------------------------------------------------------------------------------------------------------------------------------------------------------------------------------------------------------------------------------------------------------------------------------------------------------------------------------------------------------------------------------------------------------------------------------------------------------------------------------------------------------------------------------------------------------------------------------------------------------------------------------------------------------------------------------------------------------------------------------------------------------------------|
| <p><b>General</b></p> <ul style="list-style-type: none"> <li>• A benefit with using videos</li> <li>• Good combination with voice and animation</li> <li>• Soft, gentle voice</li> <li>• Friendly</li> <li>• Calm</li> <li>• General positive feedback</li> <li>• Captures interest/attention</li> <li>• Less concerns now with experience</li> </ul> <p><b>Standardisation</b></p> <ul style="list-style-type: none"> <li>• Applicable across populations</li> <li>• Offers a more standardised protocol</li> <li>• Good explanation for researcher/clinician too</li> </ul> <p><b>Animation</b></p> <ul style="list-style-type: none"> <li>• The visuals are very helpful</li> <li>• Liked that it was a person of colour</li> <li>• Liked that the person is gender neutral-more relatable</li> <li>• Liked the motivational mouse</li> <li>• Shows empathy</li> <li>• Respectful</li> <li>• Thoughtful</li> <li>• Liked the camera example</li> <li>• Liked the phone example</li> <li>• Good, simple trauma examples</li> <li>• Liked the character</li> <li>• Good facial expression of character</li> <li>• Love the graphics</li> <li>• Liked the thought bubbles</li> <li>• Liked the movie example</li> <li>• Liked the day/night example</li> <li>• Liked the car crash example</li> </ul> <p><b>Explanation/Clarity</b></p> <ul style="list-style-type: none"> <li>• Good explanation of sensory aspects</li> <li>• Good example of functional impact</li> </ul> | <p><b>Animation</b></p> <ul style="list-style-type: none"> <li>• Clarify blood example</li> <li>• Mouse could be bigger</li> <li>• Images and words should appear together</li> <li>• Emphasise vividness of memory examples</li> <li>• Emphasise fleetingness of memory examples</li> <li>• Work visual not clear</li> <li>• Maybe show more distress</li> <li>• Add bullet points at the end</li> </ul> <p><b>Explanation of Intrusive Memories</b></p> <ul style="list-style-type: none"> <li>• Clarify between rumination and thinking over</li> <li>• Clarify more what it is not</li> <li>• Add that they come without warning</li> <li>• Clarify 'dissociation'</li> <li>• Clarify difference between re-experiencing</li> <li>• Use simpler language</li> <li>• Add something to normalise intrusive memories</li> <li>• Generalise the concentration example</li> <li>• Add "without triggers/triggers you are not aware of"</li> <li>• Add that they can be short and fragmented</li> <li>• Add more specific concentration examples</li> <li>• Doesn't cover flashbacks</li> <li>• Rumination visual not clear</li> <li>• Add something about distress</li> <li>• Add something about physical symptoms</li> <li>• Explain dissociation more</li> </ul> <p><b>Quizzes</b></p> <ul style="list-style-type: none"> <li>• Wording of quiz</li> <li>• Mention Tetris with Special Instruction</li> </ul> <p><b>Other</b></p> <ul style="list-style-type: none"> <li>• More tailored trauma event</li> <li>• Add a general list of trauma examples</li> <li>• Too slow pace at time</li> </ul> |

- Good example of disconnect
- Very clear/concise
- Easier to understand
- Very clear/helpful voice
- Good explanation of intrusive memories
- Good explanation of what may happen
- Good recap at the end
- Good differentiation between thinking and rumination
- Good balance of information

**Length and Speed**

- Pace allows for time to process materials
- Good overall pace
- Brief questions

**Quizzes**

- Checks for understandings
- Good quiz questions
- Good to have quiz questions

- Mouse took away focus
- Don't use the word trauma
- Say "negative experience" instead

## Feedback on the “How to play Tetris with mental rotation” video and quiz

| Positive                                                                                                                                                                                                                                                                                                                                                                                                                                                                                                                                                                                                                                                                                                                                                                                                                                                                                                                                                                                                                                                                                                                                                                                                                                                                                                                                                                                                                                                                                                                                                                                   | Changes                                                                                                                                                                                                                                                                                                                                                                                                                                                                                                                                                                                                                                                                                                                                                                                                                                                                                                                                                                                                                                                                                                                                                                                                                                                                                                                                                                                                                                                                                                                                                                                                                                                           |
|--------------------------------------------------------------------------------------------------------------------------------------------------------------------------------------------------------------------------------------------------------------------------------------------------------------------------------------------------------------------------------------------------------------------------------------------------------------------------------------------------------------------------------------------------------------------------------------------------------------------------------------------------------------------------------------------------------------------------------------------------------------------------------------------------------------------------------------------------------------------------------------------------------------------------------------------------------------------------------------------------------------------------------------------------------------------------------------------------------------------------------------------------------------------------------------------------------------------------------------------------------------------------------------------------------------------------------------------------------------------------------------------------------------------------------------------------------------------------------------------------------------------------------------------------------------------------------------------|-------------------------------------------------------------------------------------------------------------------------------------------------------------------------------------------------------------------------------------------------------------------------------------------------------------------------------------------------------------------------------------------------------------------------------------------------------------------------------------------------------------------------------------------------------------------------------------------------------------------------------------------------------------------------------------------------------------------------------------------------------------------------------------------------------------------------------------------------------------------------------------------------------------------------------------------------------------------------------------------------------------------------------------------------------------------------------------------------------------------------------------------------------------------------------------------------------------------------------------------------------------------------------------------------------------------------------------------------------------------------------------------------------------------------------------------------------------------------------------------------------------------------------------------------------------------------------------------------------------------------------------------------------------------|
| <p><b>General</b></p> <ul style="list-style-type: none"> <li>• A benefit with using videos</li> <li>• Captures attention</li> <li>• General Positive Feedback</li> <li>• Good combination with voice and animation</li> <li>• Calming</li> <li>• Educational</li> <li>• Less distraction</li> <li>• Keeps your attention</li> <li>• Soft, gentle voice</li> <li>• Human Element</li> <li>• Fun (Tetris quiz)</li> </ul> <p><b>Standardisation</b></p> <ul style="list-style-type: none"> <li>• Offers a more standardised protocol</li> <li>• Applicable across populations</li> </ul> <p><b>Animation</b></p> <ul style="list-style-type: none"> <li>• Colourful</li> <li>• Design of the blocks</li> <li>• Good animation with the brain</li> <li>• Good, middle-ground example</li> <li>• The visuals are very helpful</li> </ul> <p><b>Explanation/Clarity</b></p> <ul style="list-style-type: none"> <li>• Clear division of instructions</li> <li>• Clearly explains the instructions</li> <li>• Very clear/concise</li> <li>• Very clear/helpful voice</li> <li>• Easier to explain what the game is</li> <li>• Easier to understand</li> <li>• Good explanation of the game</li> <li>• Good focus on next 3 pieces</li> <li>• Good, useful recaps</li> <li>• Good, clear focus on mental rotation</li> <li>• Good wording / simple language</li> </ul> <p><b>Length and Speed</b></p> <ul style="list-style-type: none"> <li>• A good length of time/short</li> <li>• Good overall pace</li> <li>• Time saving</li> <li>• Pace allows for time to process the materials</li> </ul> | <p><b>Explanation of the Tetris game</b></p> <ul style="list-style-type: none"> <li>• Start with basic instructions first</li> <li>• Add instruction to turn off notifications</li> <li>• Address breaks and game play duration</li> <li>• Address that points/score does not matter</li> <li>• Address that there is a "hold" function</li> <li>• Address the speed of the game, there is no need to rush</li> <li>• Address what to do after "game over"</li> <li>• Mention something about practicing</li> <li>• More repetition needed</li> <li>• Order of the example is wrong</li> <li>• Show what the three blocks on the side mean earlier</li> </ul> <p><b>Explanation of Mental Rotation</b></p> <ul style="list-style-type: none"> <li>• Add another example</li> <li>• Emphasise mental rotation more</li> <li>• End with Mental Rotation explanation</li> <li>• Enforce mental rotation over points</li> </ul> <p><b>Animation</b></p> <ul style="list-style-type: none"> <li>• Personify the brain more</li> <li>• Adjust colour contrast with blocks on brain</li> </ul> <p><b>Other</b></p> <ul style="list-style-type: none"> <li>• Mention "Tetris with special instructions"</li> <li>• Address other things in protocol</li> <li>• Clarify audience for quiz questions</li> <li>• Cut down on long gaps</li> <li>• Hard to hear the word "brain"</li> <li>• Language barrier/translations needed</li> <li>• Too slow of a pace at times</li> <li>• Dialect may be a bit difficult</li> </ul> <p><b>Quizzes</b></p> <ul style="list-style-type: none"> <li>• Wording of quiz</li> <li>• Add "planning in mind's eye" in Tetris quiz</li> </ul> |

**Feedback more generally on next steps for advancing digital remote delivery**

| Suggestions for Next Video/Steps                                                                                                                                                                                                                                                                                                                                                                                                                                                                                                                                                                                                                                                                                                                                                                                                                                                   | General Concerns                                                                                                                                                                                                                                                                                                                                                                                                                                                                                                                                                                                                                                                                                                                                                                                                                                                                                                                                                                                                                                                                                                                                                                                                                                                                                                                                                               |
|------------------------------------------------------------------------------------------------------------------------------------------------------------------------------------------------------------------------------------------------------------------------------------------------------------------------------------------------------------------------------------------------------------------------------------------------------------------------------------------------------------------------------------------------------------------------------------------------------------------------------------------------------------------------------------------------------------------------------------------------------------------------------------------------------------------------------------------------------------------------------------|--------------------------------------------------------------------------------------------------------------------------------------------------------------------------------------------------------------------------------------------------------------------------------------------------------------------------------------------------------------------------------------------------------------------------------------------------------------------------------------------------------------------------------------------------------------------------------------------------------------------------------------------------------------------------------------------------------------------------------------------------------------------------------------------------------------------------------------------------------------------------------------------------------------------------------------------------------------------------------------------------------------------------------------------------------------------------------------------------------------------------------------------------------------------------------------------------------------------------------------------------------------------------------------------------------------------------------------------------------------------------------|
| <p><b>Technological Needs</b></p> <ul style="list-style-type: none"> <li>• Explain setup</li> <li>• Explain/troubleshoot general problems</li> <li>• Explain/troubleshoot tech problems</li> <li>• Need to address using different devices/platforms</li> </ul> <p><b>Other parts of the intervention</b></p> <ul style="list-style-type: none"> <li>• Explain the difference between flashbacks and intrusive memories</li> <li>• How to create a list for intrusive memories</li> <li>• Need to have video on filling in diary</li> <li>• Reminder of memory recall</li> </ul> <p><b>Other</b></p> <ul style="list-style-type: none"> <li>• Prepare a handout with instructions</li> <li>• Make videos downloadable</li> <li>• Provide answer key to quiz questions</li> <li>• Add character to all videos</li> <li>• Translation</li> <li>• Voice over for questions</li> </ul> | <p><b>Communication with participant</b></p> <ul style="list-style-type: none"> <li>• If participants don't understand</li> <li>• Ensuring a bidirectional relationship</li> <li>• Checking for understanding</li> <li>• How participants will ask questions</li> <li>• Chance to practice online with clinician</li> <li>• Can't check if paying attention</li> <li>• Can't visually see if participants understand</li> <li>• Face-to-face might be better for trauma survivors</li> <li>• Making sure instructions are followed</li> <li>• Need context for participants</li> <li>• Start with having researcher there</li> <li>• The need for giving feedback to participants</li> <li>• The need to give participant encouragement</li> </ul> <p><b>Other</b></p> <ul style="list-style-type: none"> <li>• Following the order of the videos</li> <li>• Need to think a lot about explanation of intrusive memory video</li> <li>• No access to Wi-Fi for some</li> <li>• Subtitles are not enough</li> <li>• The style might not be taken seriously</li> <li>• Overall logistics</li> <li>• May not get the quiz right</li> <li>• Should reach out to participants</li> <li>• Make sure participants are listening</li> <li>• Participants finding the time and place</li> <li>• Participants who can't read</li> <li>• What platform will they view these on</li> </ul> |
